# Supplementary material for: Impact of substituent position on crystal structure and photoconductivity in 1D and 2D lead(ii) benzenethiolate coordination polymers
Source: Royal Society of Chemistry journal article supplement (doi:10.1039/d3tc04362b), 2023-12-29
Supplement: d3tc04362b1.pdf [file d3tc04362b1.pdf]

## Supplementary Information

### **Impact of substituent position on crystal structure and photoconductivity in 1D and 2D lead(II) benzenethiolate coordination polymers**

Ryohei Akiyoshi,<sup>\*a</sup> Akinori Saeiki,<sup>b</sup> Kazuyoshi Ogasawara,<sup>a</sup> Daisuke Tanaka<sup>\*a</sup>

<sup>a</sup> Department of Chemistry, School of Science, Kwansai Gakuin University, 1 Gakuen, Sanda, Hyogo 669-1337, Japan

<sup>b</sup> Department of Applied Chemistry, Graduate School of Engineering, Osaka University, 2-1 Yamadaoka, Suita, Osaka 565-0871, Japan

## Table of Contents

|                                                                                       |     |
|---------------------------------------------------------------------------------------|-----|
| <b>Fig. S1.</b> SEM textures .....                                                    | S3  |
| <b>Table S1.</b> Crystallographic data.....                                           | S4  |
| <b>Fig. S2.</b> Asymmetric units.....                                                 | S5  |
| <b>Fig. S3.</b> Pb–S and Pb–O bond length.....                                        | S6  |
| <b>Fig. S4.</b> Coordination mode of SPhOMe anions .....                              | S7  |
| <b>Fig. S5.</b> Crystal structures focusing on the (–Pb–S–) <sub>n</sub> network..... | S8  |
| <b>Fig. S6.</b> Packing structures.....                                               | S9  |
| <b>Fig. S7.</b> Dinuclear coordination unit of <b>KGF-33</b> .....                    | S10 |
| <b>Fig. S8.</b> Interlayer distance between 2D layers for <b>KGF-34</b> .....         | S10 |
| <b>Fig. S9.</b> PXRD patterns of pure products.....                                   | S11 |
| <b>Fig. S10.</b> TGA results .....                                                    | S12 |
| <b>Fig. S11.</b> Chemical stability toward water, 1 M HCl aq., and 1 M NaOH aq. ....  | S13 |
| <b>Fig. S12.</b> Chemical stability toward organic solvent .....                      | S14 |
| <b>Fig. S13.</b> PYS results .....                                                    | S15 |
| <b>Fig. S14.</b> TRMC results for <b>KGF-32</b> and <b>KGF-33</b> .....               | S16 |
| <b>Table S2.</b> TRMC results obtained for photoconductive S-CPs .....                | S16 |
| <b>Fig. S15.</b> Mapping of VBM and CBM for <b>KGF-32</b> .....                       | S17 |
| <b>Fig. S16.</b> Mapping of VBM and CBM for <b>KGF-33</b> .....                       | S18 |
| <b>Fig. S17.</b> Mapping of VBM and CBM for <b>KGF-34</b> .....                       | S19 |
| Reference.....                                                                        | S20 |

(a)

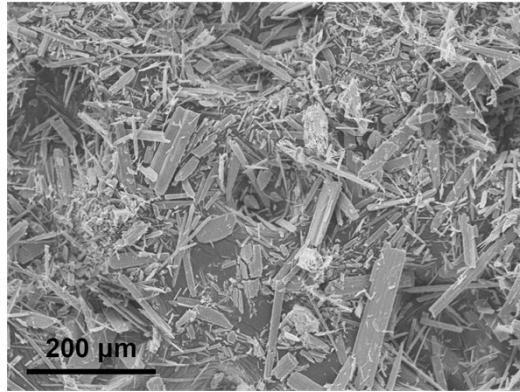

(b)

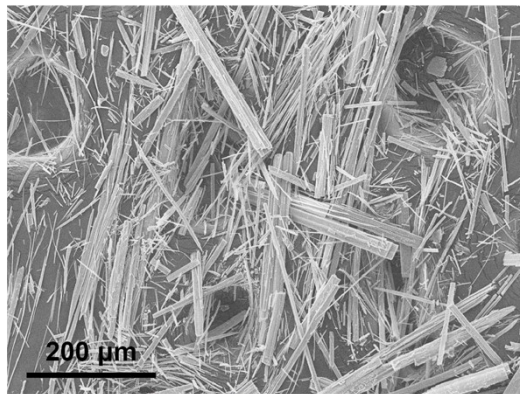

(c)

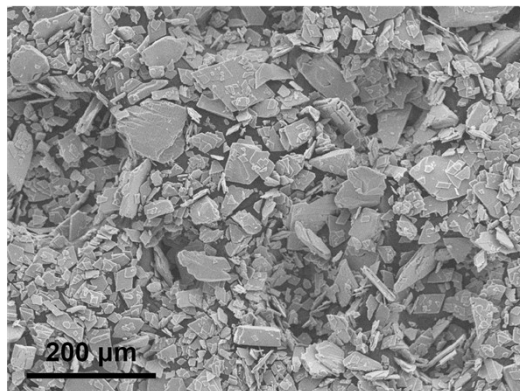

**Fig. S1.** SEM textures of (a) **KGF-32**, (b) **KGF-33**, and (c) **KGF-34**.

**Table S1.** Crystallographic data for **KGF-32**, **KGF-33**, and **KGF-34**.

| Compound                                            | <b>KGF-32</b>                                                   | <b>KGF-33</b>                                                   | <b>KGF-34</b>                                                   |
|-----------------------------------------------------|-----------------------------------------------------------------|-----------------------------------------------------------------|-----------------------------------------------------------------|
| Formula                                             | C <sub>14</sub> H <sub>14</sub> O <sub>2</sub> PbS <sub>2</sub> | C <sub>14</sub> H <sub>14</sub> O <sub>2</sub> PbS <sub>2</sub> | C <sub>14</sub> H <sub>14</sub> O <sub>2</sub> PbS <sub>2</sub> |
| Formula weight                                      | 485.56                                                          | 485.56                                                          | 485.56                                                          |
| <i>T</i> / K                                        | 150                                                             | 150                                                             | 150                                                             |
| Crystal system                                      | Monoclinic                                                      | Monoclinic                                                      | Monoclinic                                                      |
| Space group                                         | <i>P2</i> <sub>1</sub> / <i>c</i>                               | <i>P2</i> <sub>1</sub> / <i>c</i>                               | <i>P2</i> / <i>n</i>                                            |
| <i>a</i> / Å                                        | 9.5333 (3)                                                      | 4.1327 (2)                                                      | 7.6715 (4)                                                      |
| <i>b</i> / Å                                        | 19.6388 (5)                                                     | 31.0738 (11)                                                    | 5.1900 (2)                                                      |
| <i>c</i> / Å                                        | 7.7462 (3)                                                      | 11.0299 (4)                                                     | 34.4254 (13)                                                    |
| <i>α</i> / deg                                      | 90                                                              | 90                                                              | 90                                                              |
| <i>β</i> / deg                                      | 95.886 (3)                                                      | 95.467 (4)                                                      | 90.992 (4)                                                      |
| <i>γ</i> / deg                                      | 90                                                              | 90                                                              | 90                                                              |
| <i>V</i> / Å <sup>3</sup>                           | 1456.28                                                         | 1410.00 (10)                                                    | 1370.44 (10)                                                    |
| <i>Z</i>                                            | 4                                                               | 4                                                               | 4                                                               |
| $\rho_{\text{calc}}$ / g cm <sup>-3</sup>           | 2.236                                                           | 2.287                                                           | 12.609                                                          |
| $\mu$ / mm <sup>-1</sup>                            | 11.987                                                          | 12.255                                                          | 12.609                                                          |
| <i>F</i> <sub>000</sub>                             | 912.0                                                           | 912.0                                                           | 912.0                                                           |
| <i>R</i> <sub>1</sub> ( <i>I</i> > 2σ( <i>I</i> ))  | 0.0194                                                          | 0.0370                                                          | 0.0344                                                          |
| <i>R</i> <sub>1</sub> (all data)                    | 0.0234                                                          | 0.0430                                                          | 0.0425                                                          |
| <i>wR</i> <sub>2</sub> ( <i>I</i> > 2σ( <i>I</i> )) | 0.0456                                                          | 0.0874                                                          | 0.0855                                                          |
| <i>wR</i> <sub>2</sub> (all data)                   | 0.0474                                                          | 0.0907                                                          | 0.0906                                                          |
| GOF                                                 | 1.030                                                           | 1.079                                                           | 1.122                                                           |
| CCDC number                                         | 2308865                                                         | 2308866                                                         | 2308867                                                         |

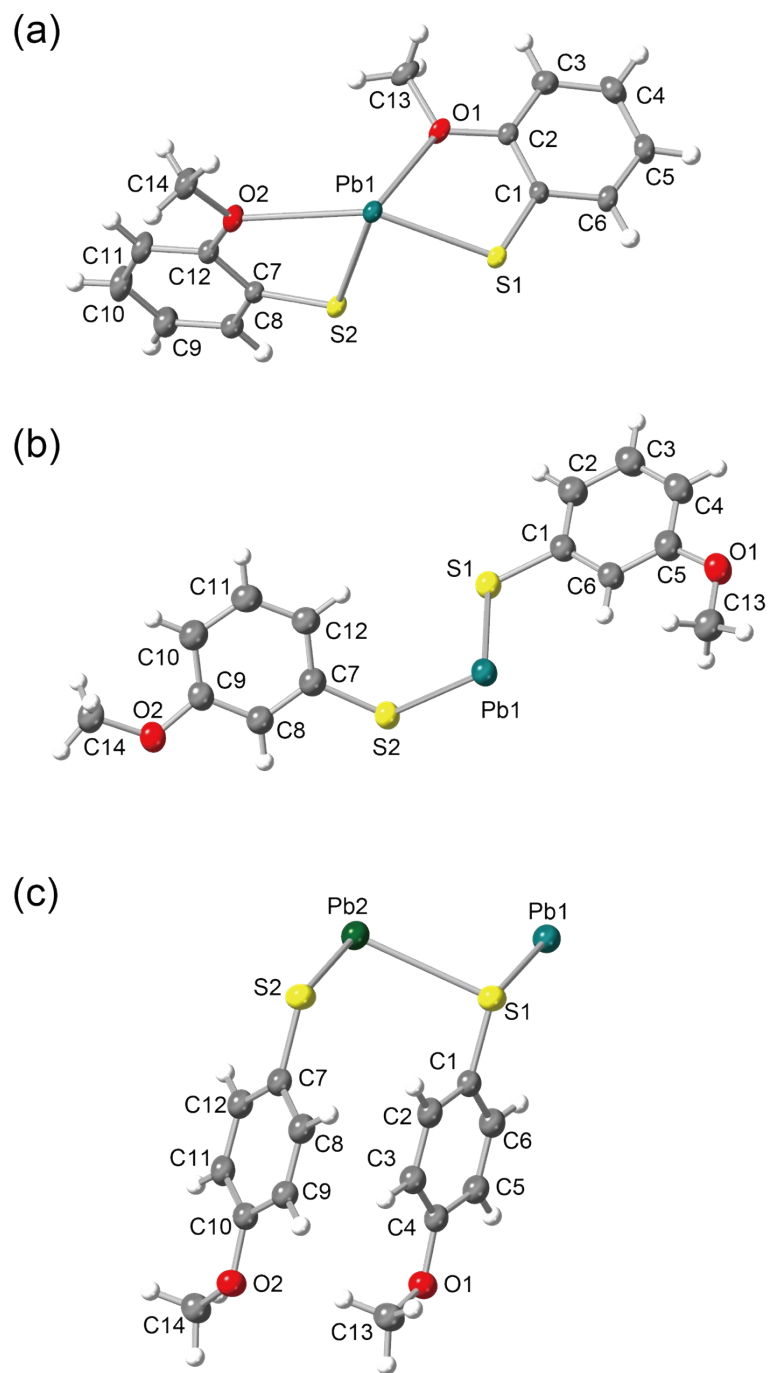

**Fig. S2.** Asymmetric units of (a) **KGF-32**, (b) **KGF-33**, and (c) **KGF-34**.

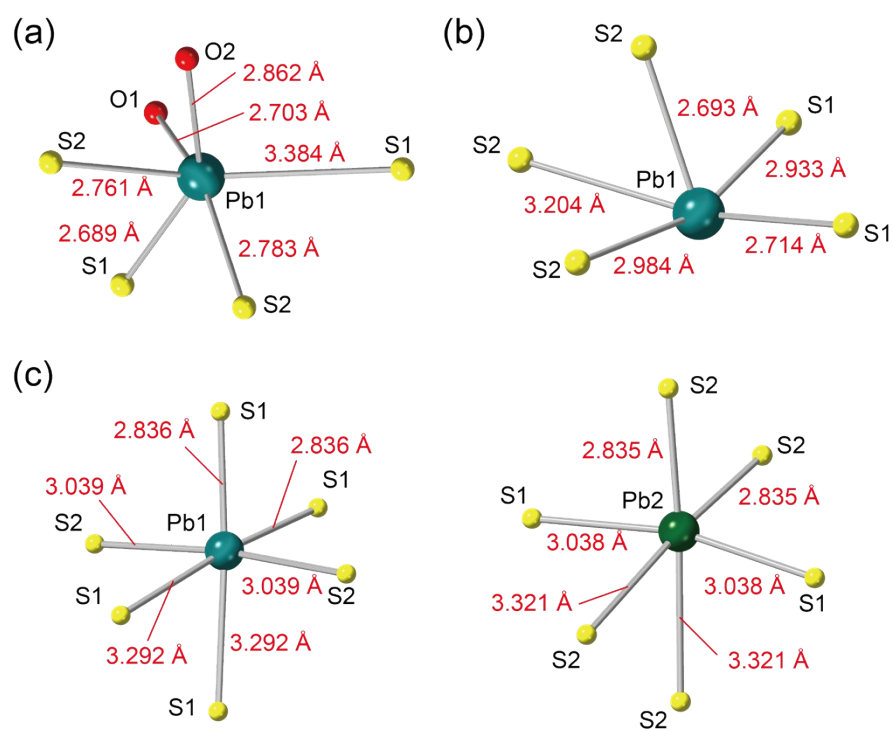

**Fig. S3.** Pb–S and Pb–O bond lengths of (a) **KGF-32**, (b) **KGF-33**, and (c) **KGF-34**.

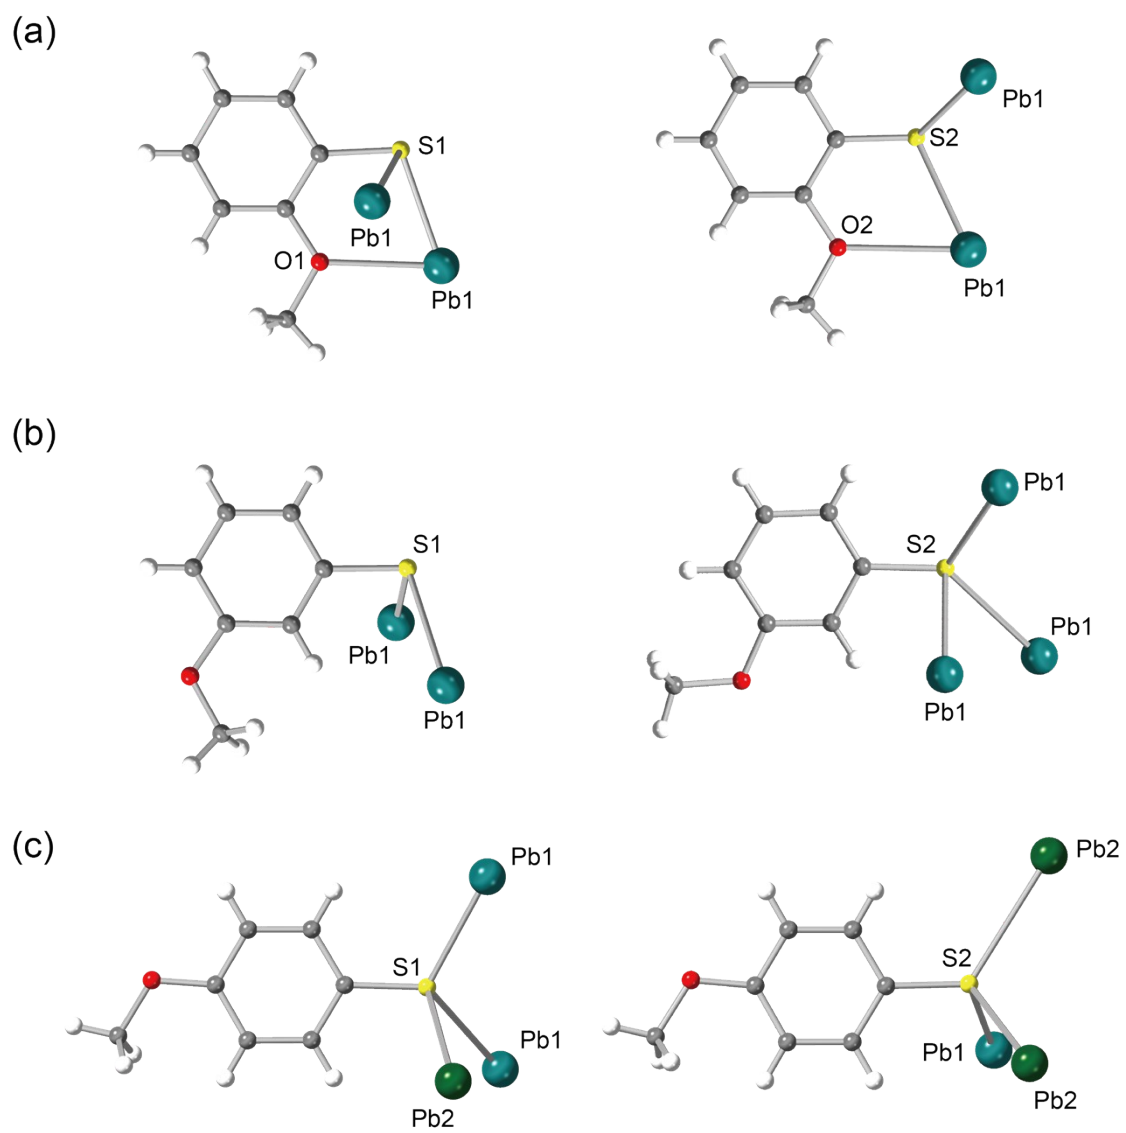

**Fig. S4.** Coordination mode of SPhOMe<sup>-</sup> anions of (a) **KGF-32**, (b) **KGF-33**, and (c) **KGF-34**.

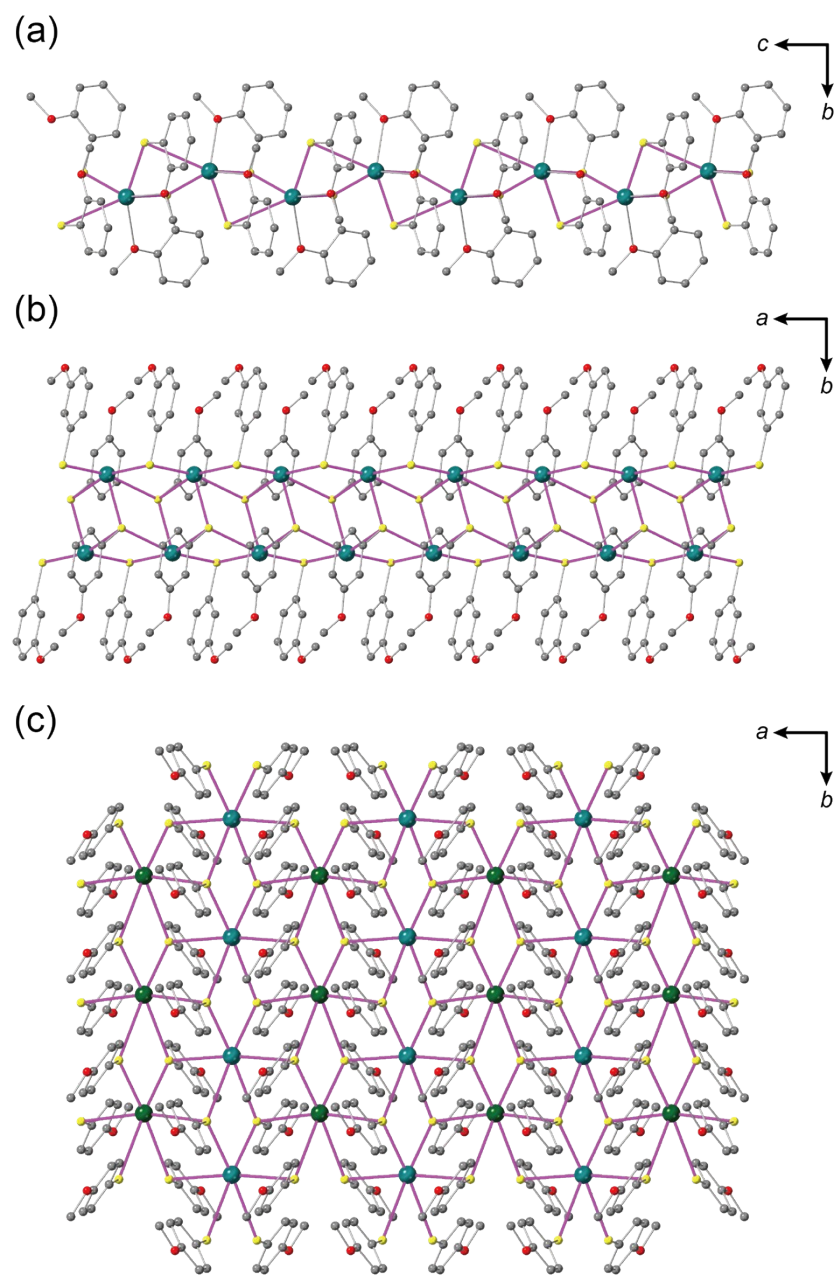

**Fig. S5.** Crystal structures focusing on the  $(-Pb-S-)_n$  network in (a) **KGF-32**, (b) **KGF-33**, and (c) **KGF-34**. Pb-S bond is colored purple.



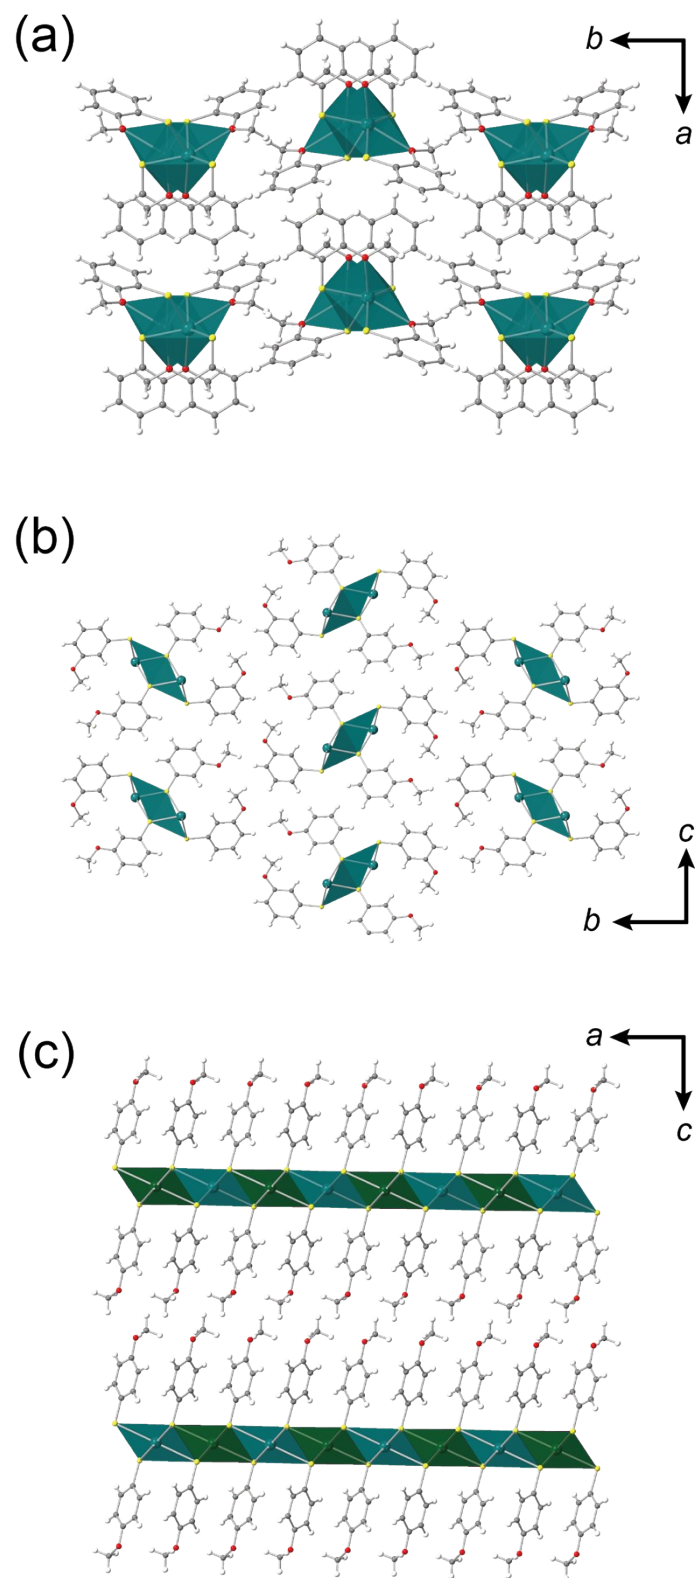

Fig. S6. Packing structures of (a) KGF-32, (b) KGF-33, and (c) KGF-34.

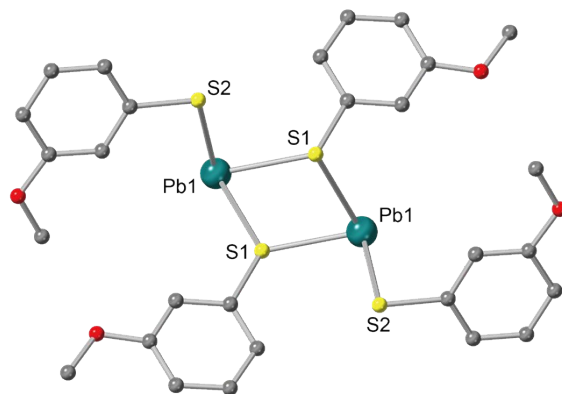

**Fig. S7.** Dinuclear coordination unit of **KGF-33**.

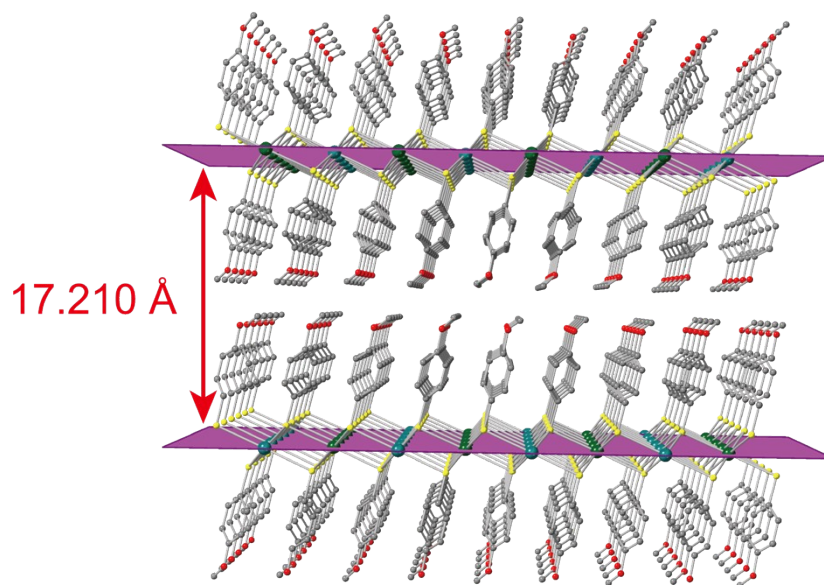

**Fig. S8.** Interlayer distance between 2D layers for **KGF-34**.

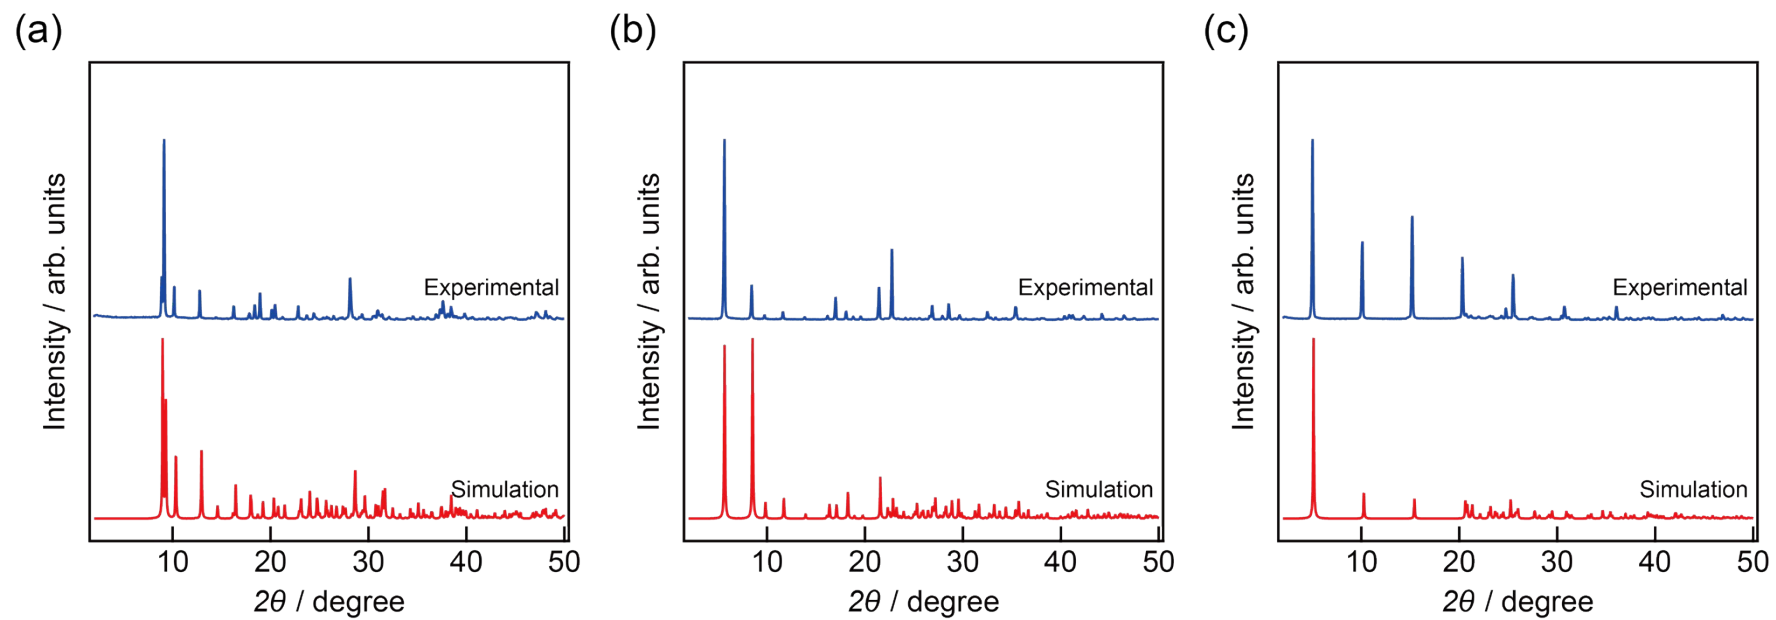

**Fig. S9.** PXR D patterns of (a) **KGF-32**, (b) **KGF-33**, and (c) **KGF-34** (red: Experimental, blue: Simulation).

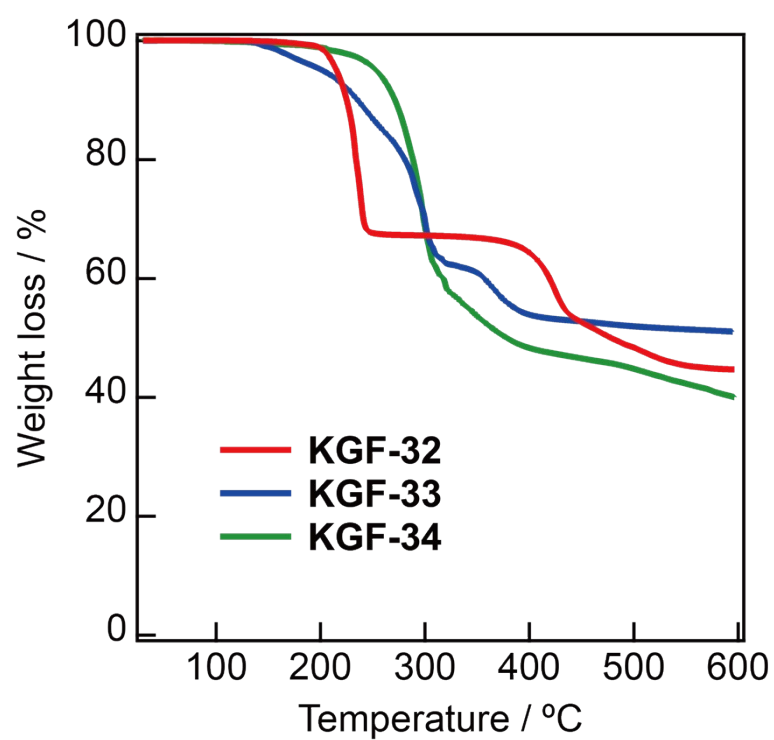

**Fig. S10.** TGA results for **KGF-32** (red), **KGF-33** (blue), and **KGF-34** (green) in the temperature range 30–600 °C at 10 °C min<sup>-1</sup>.

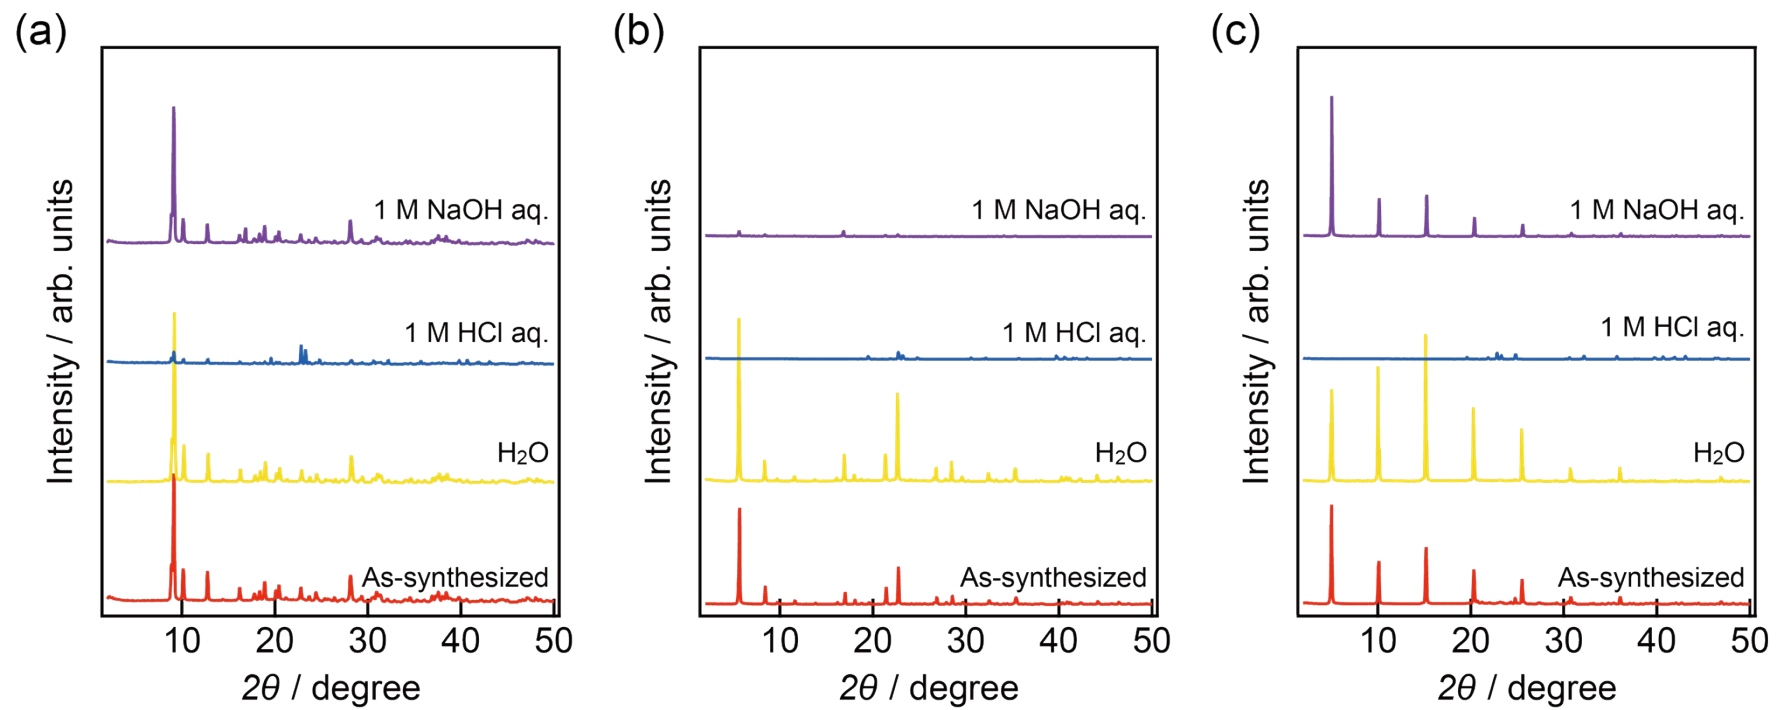

**Fig. S11.** Chemical stability of (a) **KGF-32**, (b) **KGF-33**, and (c) **KGF-34** toward water, 1 M HCl aq, and 1 M NaOH aq.

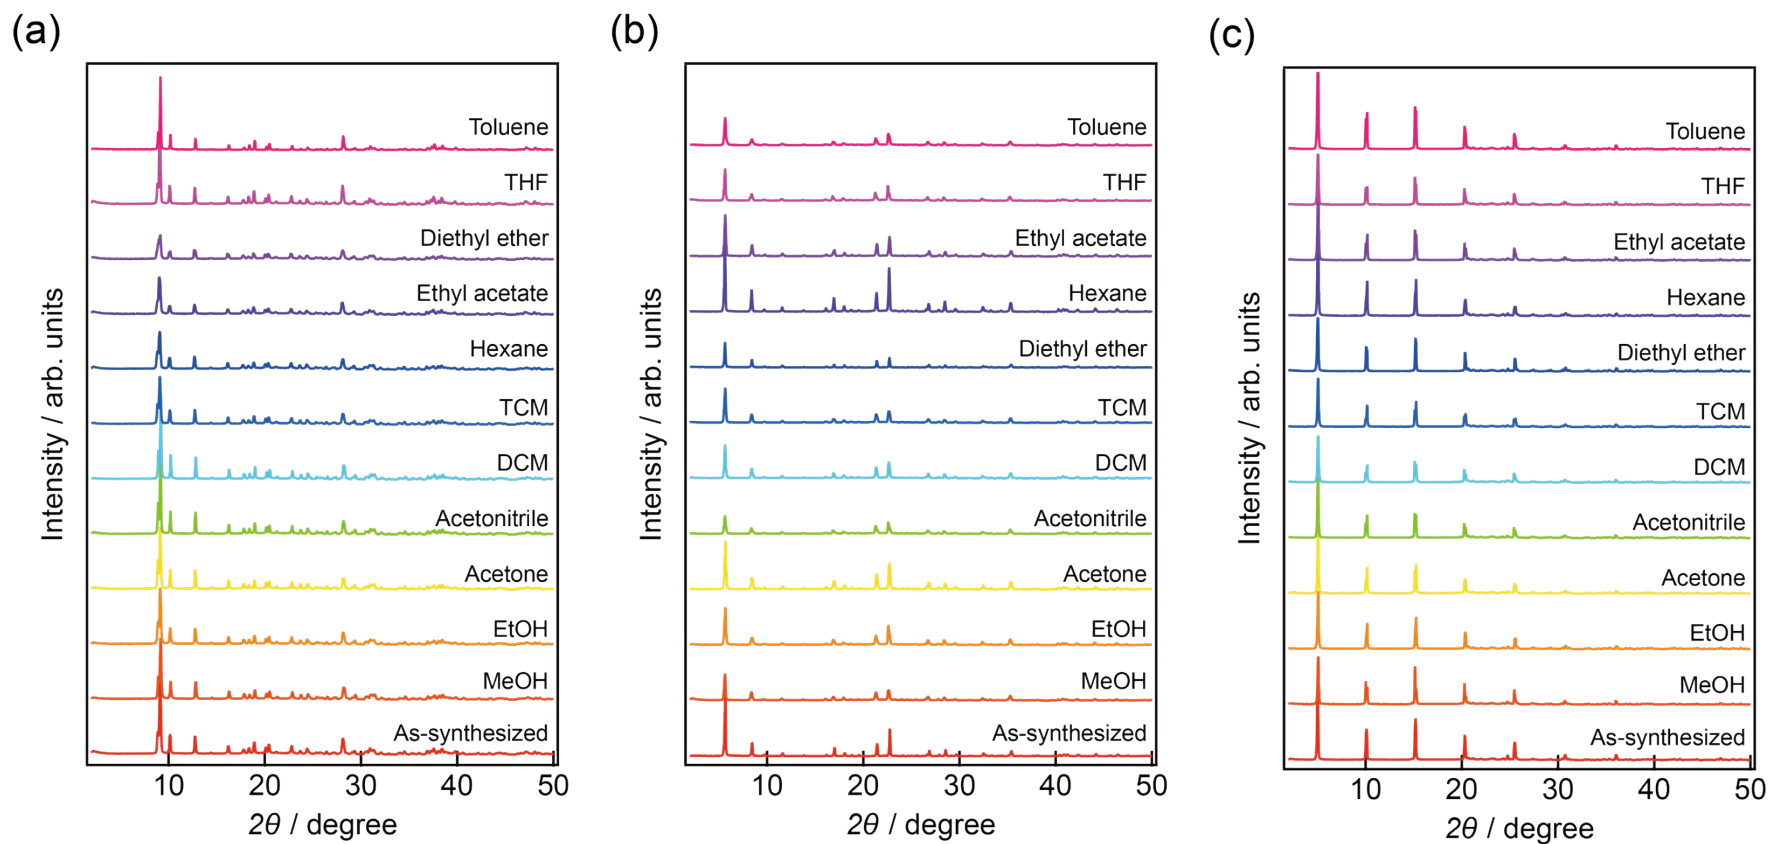

**Fig. S12.** Chemical stability of (a) **KGF-32**, (b) **KGF-33**, and (c) **KGF-34** toward various organic solvents. PXRD patterns were collected after soaking in methanol (MeOH), ethanol (EtOH), acetone, acetonitrile, dichloromethane (DCM), trichloromethane (TCM), hexane, ethyl acetate, diethyl ether, tetrahydrofuran (THF), and toluene.

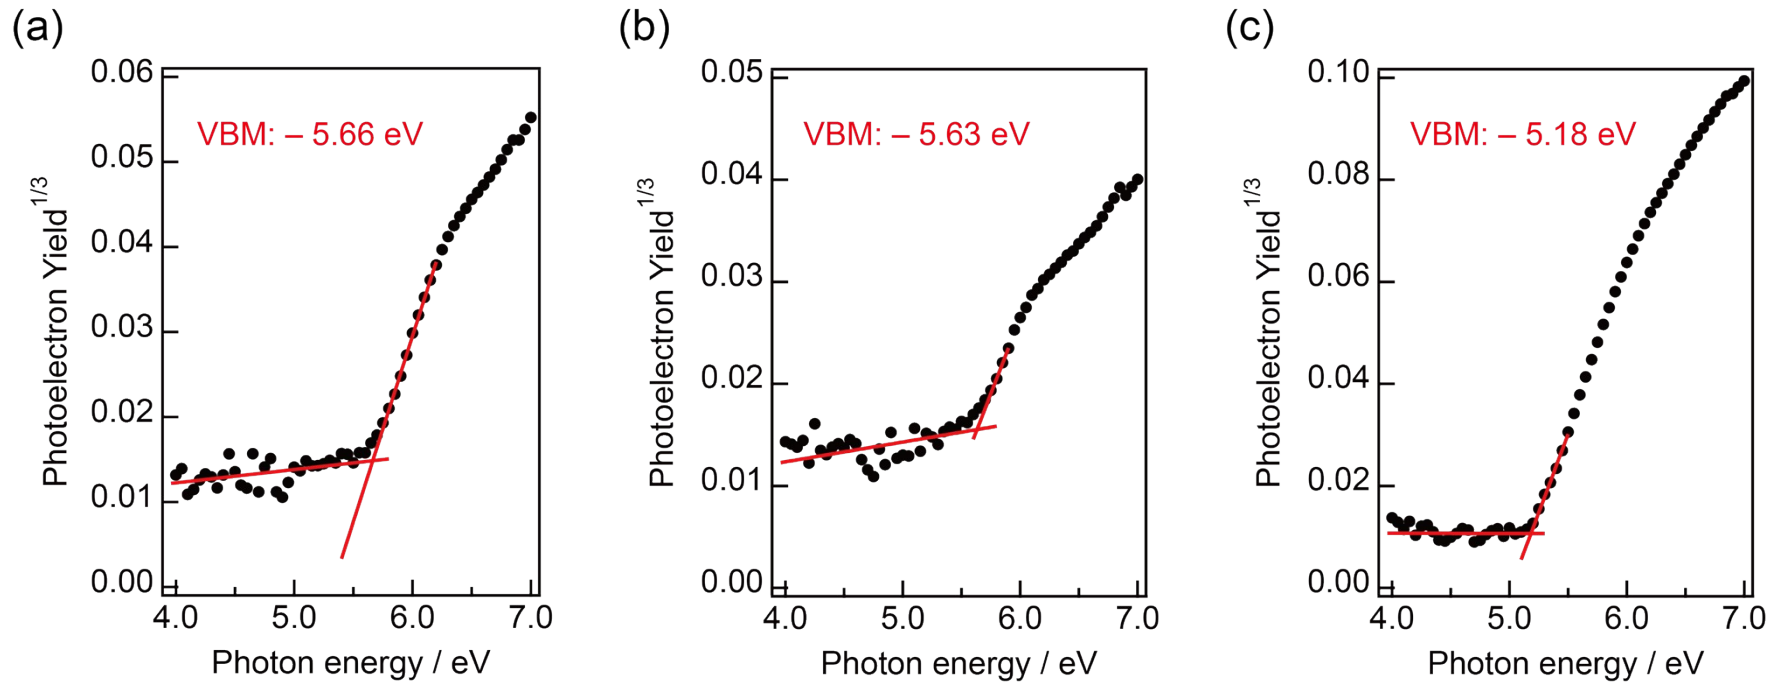

**Fig. S13.** PYS results for (a) **KGF-32**, (b) **KGF-33**, and (c) **KGF-34**.

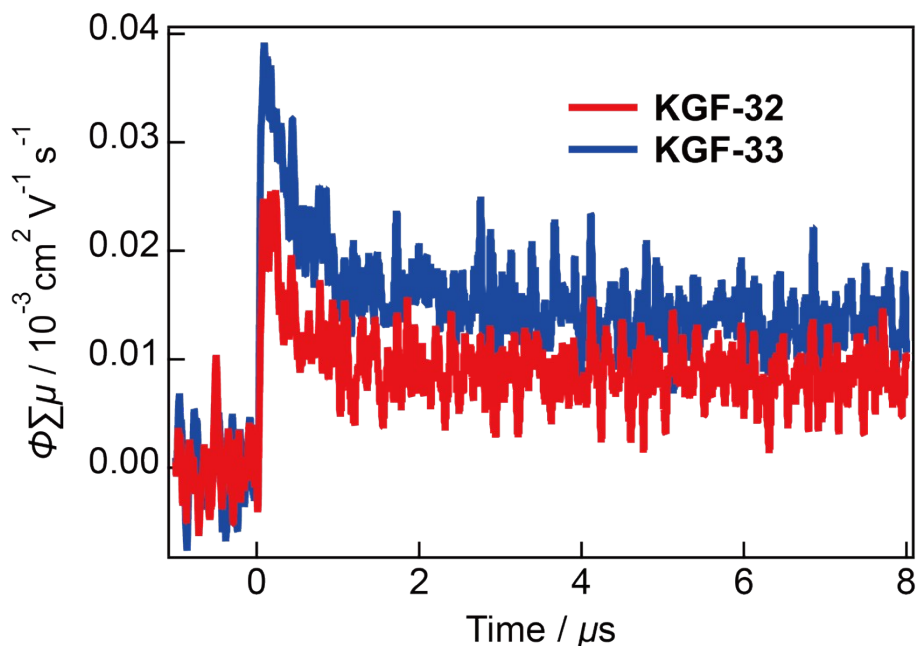

**Fig. S14.** TRMC results for **KGF-32** (red) and **KGF-33** (blue).

**Table S2.** TRMC results obtained for photoconductive S-CPs ( $\lambda_{\text{ex}} = 355 \text{ nm}$ ,  $I_0 = 9.1 \times 10^{15}$  photons  $\text{cm}^{-2}$ ).

| Compound                                                                     | $\varphi \Sigma \mu_{\text{max}} / \text{cm}^2 \text{V}^{-1} \text{s}^{-1}$ | Reference |
|------------------------------------------------------------------------------|-----------------------------------------------------------------------------|-----------|
| $[\text{Pb}_3\text{ttc}_2 \cdot 2\text{H}_2\text{O}]_n$                      | $7.4 \times 10^{-5}$                                                        | S1        |
| $[\text{Pb}(\text{tadt})]_n$                                                 | $4.9 \times 10^{-5}$                                                        | S2        |
| $[\text{Sn}_2(\text{Httc})_2 \cdot \text{MeOH}]_n$                           | $1.8 \times 10^{-5}$                                                        | S3        |
| $[\text{Ag}_2\text{Httc}]_n$                                                 | $2.7 \times 10^{-5}$                                                        | S4        |
| $[\text{AgH}_2\text{ttc}]_n$                                                 | $2.8 \times 10^{-5}$                                                        | S4        |
| $[\text{Ag}_3\text{ttc}]_n$                                                  | $1.5 \times 10^{-4}$                                                        | S4        |
| $[\text{Ag}(\text{tzdt})]_n$                                                 | $3.6 \times 10^{-5}$                                                        | S5        |
| $[\text{Ag}_2(\text{tzdt})(\text{TFA})]_n$                                   | $2.2 \times 10^{-5}$                                                        | S5        |
| $\text{Mn}_2(\text{DSBDC})$                                                  | $1.8 \times 10^{-5}$                                                        | S6        |
| $\text{Cu}_4^{\text{I}}\text{Cu}_2^{\text{II}}\text{Br}_4(\text{pyr-dtc})_4$ | $3.0 \times 10^{-5}$                                                        | S6        |
| $[\text{Pb}(o\text{-SPhOMe})_2]_n$ ( <b>KGF-32</b> )                         | $2.5 \times 10^{-5}$                                                        | This work |
| $[\text{Pb}(m\text{-SPhOMe})_2]_n$ ( <b>KGF-33</b> )                         | $3.8 \times 10^{-5}$                                                        | This work |
| $[\text{Pb}(p\text{-SPhOMe})_2]_n$ ( <b>KGF-34</b> )                         | $1.4 \times 10^{-3}$                                                        | This work |

H<sub>3</sub>ttc = trithiocyanuric acid, H<sub>2</sub>tadt = 1,3,4-thiadiazole-2,5- dithiol, Htzdt = 1,3-thiazolidine-2-thione



(a)

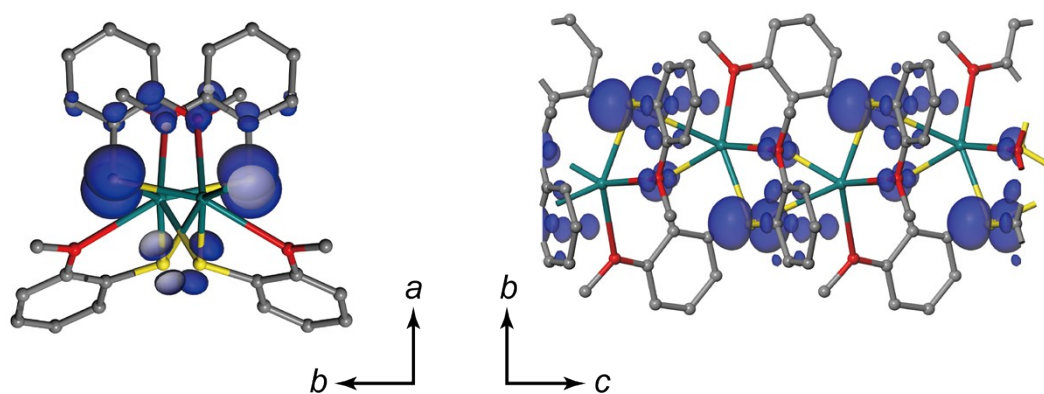

(b)

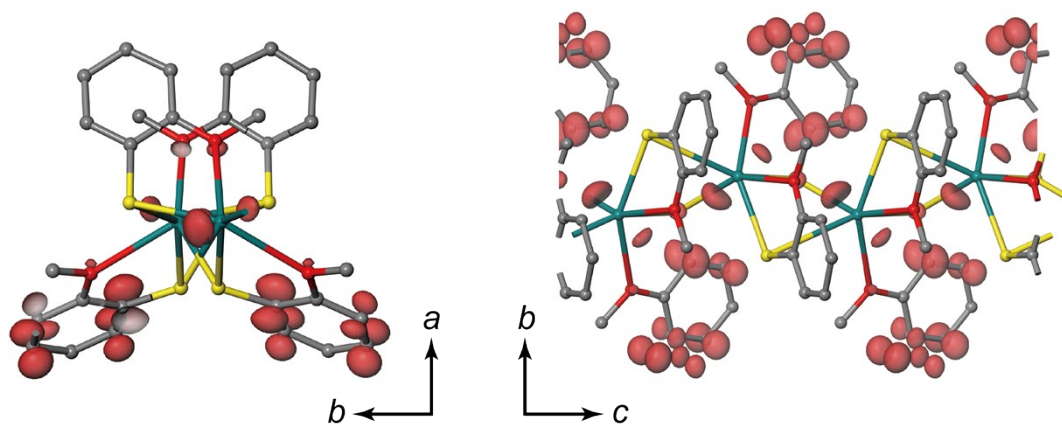

Fig. S15. Mapping of (a) VBM and (b) CBM for **KGF-32**.

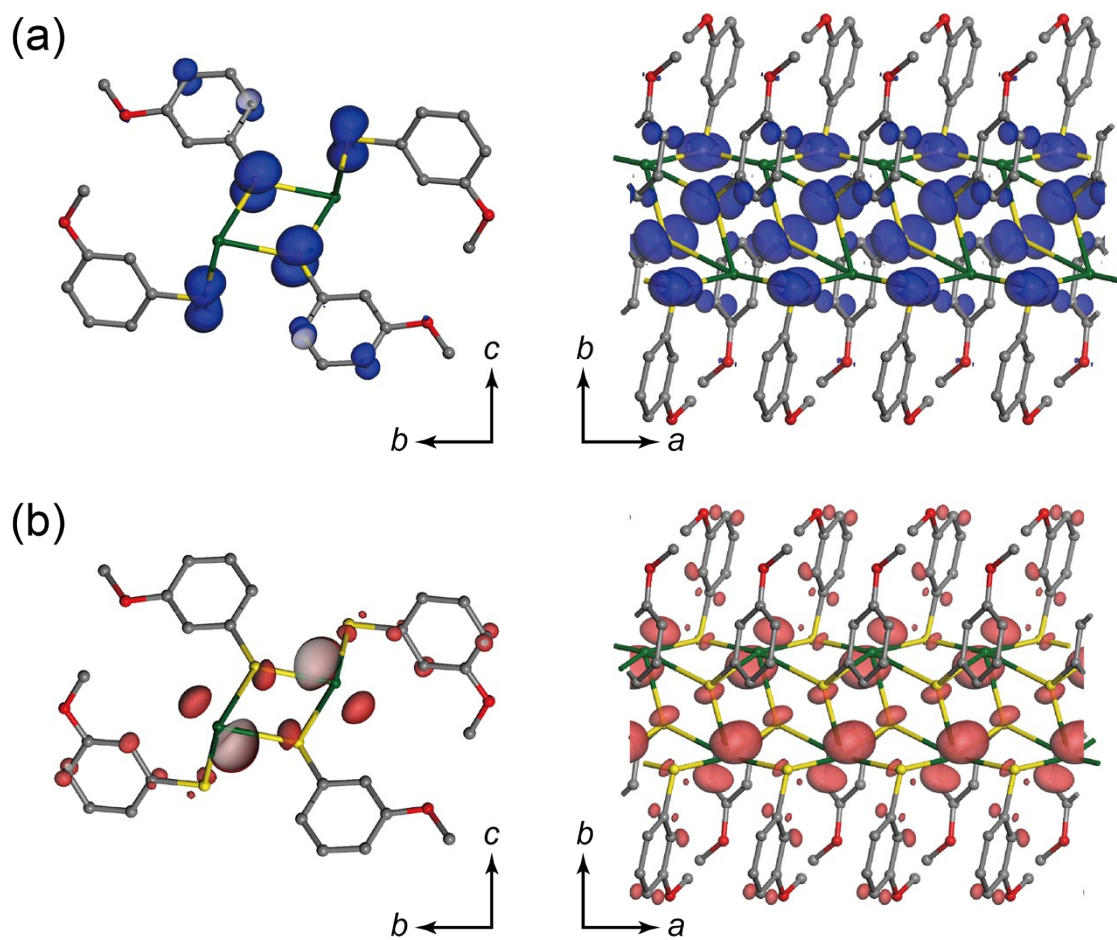

**Fig. S16.** Mapping of (a) VBM and (b) CBM for **KGF-33**.

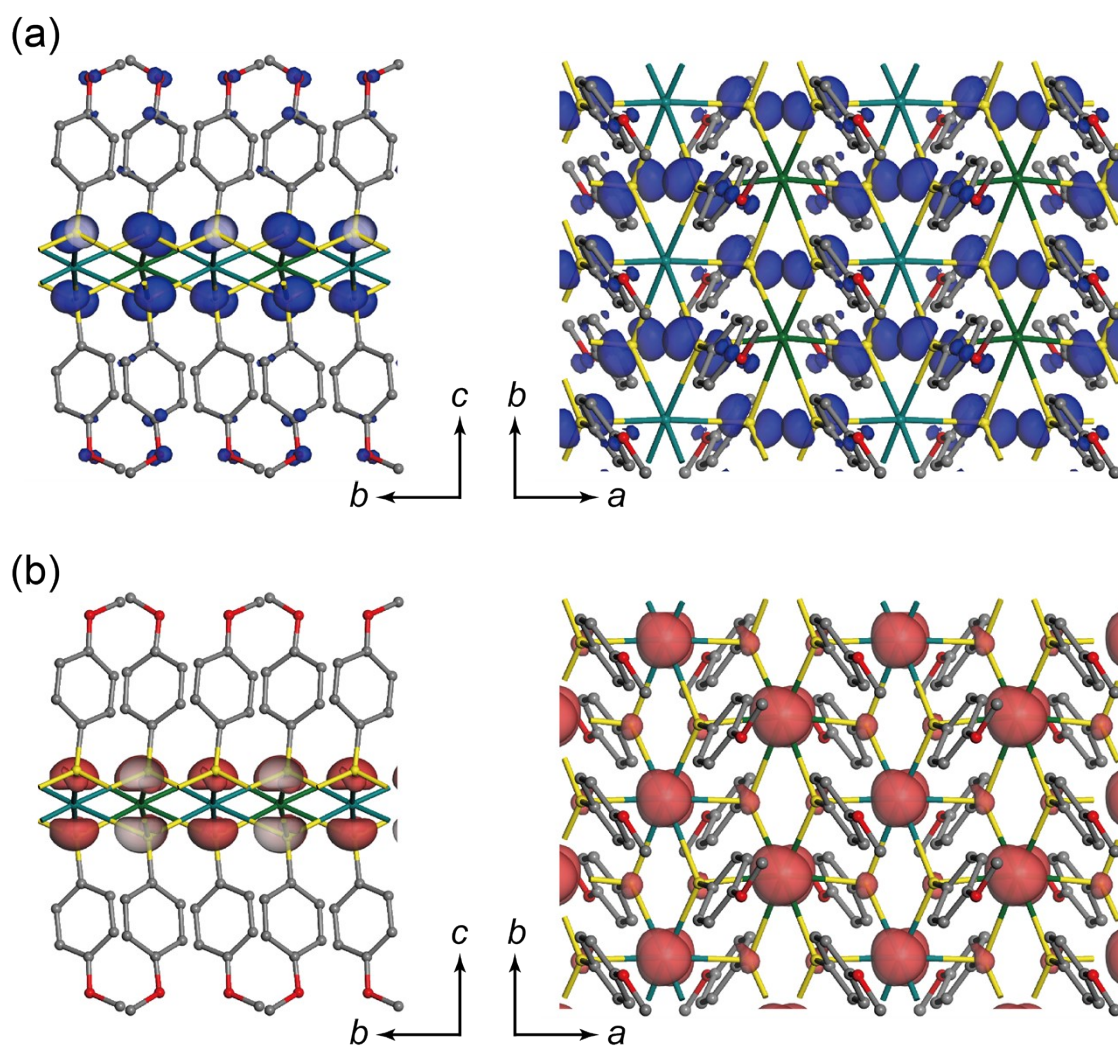

**Fig. S17.** Mapping of (a) VBM and (b) CBM for **KGF-34**.

## Reference

- S1. Y. Kamakura, P. Chinapang, S. Masaoka, A. Saeki, K. Ogasawara, S. R. Nishitani, H. Yoshikawa, T. Katayama, N. Tamai, K. Sugimoto, D. Tanaka, *J. Am. Chem. Soc.*, 2020, **142**, 27–32.
- S2. Y. Kamakura, C. Sakura, A. Saeki, S. Masaoka, A. Fukui, D. Kiriya, K. Ogasawara, H. Yoshikawa, D. Tanaka, *Inorg. Chem.*, 2021, **60**, 5436–5441.
- S3. Y. Kamakura, S. Fujisawa, K. Takahashi, H. Toshima, Y. Nakatani, H. Yoshikawa, A. Saeki, K. Ogasawara, D. Tanaka, *Inorg. Chem.*, 2021, **60**, 12691–12695.
- S4. T. Wakiya, Y. Kamakura, H. Shibahara, K. Ogasawara, A. Saeki, R. Nishikubo, A. Inokuchi, H. Yoshikawa, D. Tanaka, *Angew. Chem. Int. Ed.*, 2021, **60**, 23217–23224.
- S5. R. Akiyoshi, A. Saeki, K. Ogasawara, H. Yoshikawa, Y. Nakamura, D. Tanaka, *CrystEngComm*, 2023, **25**, 2990–2994.
- S6. T. Okubo, H. Anma, N. Tanaka, K. Himoto, S. Seki, A. Saeki, M. Maekawa, T. Kuroda-Sowa, *Chem. Commun.*, 2013, **49**, 4316–4318.
